# Supplementary material for: GP IIb/IIIa Receptor Inhibitors in Mechanically Ventilated Patients with Cardiogenic Shock due to Myocardial Infarction in the Era of Potent P2Y12 Receptor Antagonists
Source: MDPI journal article supplement (doi:10.3390/jcm11247426), 2022-12-14
Supplement: s1 [file s1]

**Supplementary Table S1.** Hospital complications and CPC score.

| Variable                  | NO – GPI<br>N = 75 | GPI<br>N = 78 | POPULATION<br>N = 153 | p       |
|---------------------------|--------------------|---------------|-----------------------|---------|
| Bronchopneumonia          | 48 (64.0)          | 49 (63.1)     | 97 (63.8)             | 1.00    |
| Renal replacement therapy | 7(9.3)             | 8 (10.3)      | 15 (9.8)              | 1.00    |
| Multiorgan failure        | 18 (24.0)          | 18 (23.1)     | 36 (23.5)             | 1.00    |
| Sepsis                    | 20 (26.7)          | 21 (26.9)     | 41 (26.8)             | 1.00    |
| Thromboembolic events     | 2 (2.7)            | 1 (1.3)       | 3 (2.09)              | 0.61    |
| Coma or vegetative state  | 16 (21.3)          | 2 (2.6)       | 18 (11.8)             | <0.0001 |
| Acute kidney injury       | 33 (56.9)          | 37 (50.0)     | 70 (53.0)             | 0.48    |
| Intracranial hemorrhage   | 3 (4.0)            | 3 (3.8)       | 6 (3.9)               | 1.00    |

CPR = cardiopulmonary resuscitation; GPI= IIb/IIIa receptor inhibitors; P2Y12=P2Y12 receptor antagonists.
